# Supplementary material for: Multi-scale data on intertidal macrobenthic biodiversity and environmental features in three New Zealand harbours
Source: Copernicus journal article supplement (doi:10.5194/essd-12-293-2020), 2020-02-10
Supplement: Supplementary file 1 [file essd-12-293-2020-supplement.zip]

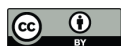

## *Supplement of*

# **Multi-scale data on intertidal macrobenthic biodiversity and environmental features in three New Zealand harbours**

**Casper Kraan et al.**

*Correspondence to:* Casper Kraan ([casper.kraan@thuenen.de](mailto:casper.kraan@thuenen.de))

- [essd-12-293-2020-supplement-title-page.pdf](#)
- [Table\\_1\\_species\\_list.xlsx](#)

The copyright of individual parts of the supplement might differ from the CC BY 4.0 License.
