# Supplementary material for: Multi-scale data on intertidal macrobenthic biodiversity and environmental features in three New Zealand harbours
Source: Copernicus journal article supplement (doi:10.5194/essd-12-293-2020), 2020-02-10
Supplement: Supplementary file 1 [file Table_1_species_list.xlsx]

## Sheet: species
abbreviation	taxonomic_name	AphiaID	phylum_class	subclass_order	family
olifat	Oligochaeta FAT	2036	Oligochaeta	Oligochaeta	Oligochaeta
olithi	Oligochaeta THIN	2036	Oligochaeta	Oligochaeta	Oligochaeta
barlep	Barantolla lepte	327084	Polychaeta	Capitellida	Capitellidae
capite	Capitella sp.	129211	Polychaeta	Capitellida	Capitellidae
hetfil	Heteromastus filiformis	129884	Polychaeta	Capitellida	Capitellidae
notoma	Notomastus sp.	129220	Polychaeta	Capitellida	Capitellidae
coscon	Cossura consimilis	326849	Polychaeta	Cossurida	Cossuridae
dorvil	Dorvilleidae	971	Polychaeta	Eunicida	Dorvilleidae
eunice	Eunicidae	966	Polychaeta	Eunicida	Eunicidae
lumbri	Lumbrineridae	967	Polychaeta	Eunicida	Lumbrineridae
armand	Armandia maculata	157220	Polychaeta	Opheliida	Opheliidae
traole	Travisia olens	173933	Polychaeta	Opheliida	Opheliidae
glycer	Glycera americana	157388	Polychaeta	Phyllodocida	Glyceridae
glytri	Glycinde trifida	240621	Polychaeta	Phyllodocida	Goniadidae
hesion	Hesionidae	946	Polychaeta	Phyllodocida	Hesionidae
ophang	Oxydromus angustifrons	710685	Polychaeta	Phyllodocida	Hesionidae
aglmac	Aglaophamus macroura	173673	Polychaeta	Phyllodocida	Nephtyidae
cerato	Ceratonereis sp.	129372	Polychaeta	Phyllodocida	Nereididae
plaaus	Platynereis australis	334555	Polychaeta	Phyllodocida	Nereididae
nicaes	Nicon aestuariensis	329814	Polychaeta	Phyllodocida	Nereididae
perval	Perinereis vallata	334459	Polychaeta	Phyllodocida	Nereididae
pholoe	Pholoe sp.	129439	Polychaeta	Phyllodocida	Pholoidae
eteone	Eteone sp.	129443	Polychaeta	Phyllodocida	Phyllodocidae
phyllo	Phyllodocidae	931	Polychaeta	Phyllodocida	Phyllodocidae
lepido	Lepidonotinae	152403	Polychaeta	Phyllodocida	Polynoidae
sphaes	Sphaerodoridae	957	Polychaeta	Phyllodocida	Sphaerodoridae
exogon	Exogoninae	152228	Polychaeta	Phyllodocida	Syllidae
sphaer	Sphaerosyllis semiverrucosa	332031	Polychaeta	Phyllodocida	Syllidae
bumcir	Bumpy cirrisyllid	948	Polychaeta	Phyllodocida	Syllidae
syllid	Syllidae	948	Polychaeta	Phyllodocida	Syllidae
owepet	Owenia petersonae	329888	Polychaeta	Sabellida	Oweniidae
euchon	Euchone sp.	129528	Polychaeta	Sabellida	Sabellidae
asychi	Asychis sp.	146522	Polychaeta	Scolecida	Maldanidae
macste	Macroclymenella stewartensis	329117	Polychaeta	Scolecida	Maldanidae
orbpap	Orbinia papillosa	334318	Polychaeta	Scolecida	Orbiniidae
scocyl	Leodamas cylindrifer	934373	Polychaeta	Scolecida	Orbiniidae
aricid	Aricidea	129430	Polychaeta	Scolecida	Paraonidae
levgra	Levinsinia gracilis	130578	Polychaeta	Scolecida	Paraonidae
parlyr	Paradoneis lyra	130585	Polychaeta	Scolecida	Paraonidae
scalib	Scalibregmatidae	925	Polychaeta	Scolecida	Scalibregmatidae
cirrat	Cirratulidae	919	Polychaeta	Spionida	Cirratulidae
magdak	Magelona dakini	329134	Polychaeta	Spionida	Magelonidae
aontri	Aonides trifida	326473	Polychaeta	Spionida	Spionidae
bocsyr	Boccardia syrtis	414038	Polychaeta	Spionida	Spionidae
polydo	Polydora sp.	129619	Polychaeta	Spionida	Spionidae
priauc	Prionospio aucklandica	338527	Polychaeta	Spionida	Spionidae
psefat	Pseudopolydora FAT	129621	Polychaeta	Spionida	Spionidae
scoben	Scolecolepides benhami	331719	Polychaeta	Spionida	Spionidae
scolel	Scolelepis sp.	129623	Polychaeta	Spionida	Spionidae
spion	Spionidae	913	Polychaeta	Spionida	Spionidae
pecaus	Lagis australis	829249	Polychaeta	Terebellida	Pectinariidae
sabell	Sabellariidae	979	Polychaeta	Terebellida	Sabellariidae
terebe	Terebellidae	982	Polychaeta	Terebellida	Terebellidae
tricho	Trichobranchidae	983	Polychaeta	Terebellida	Trichobranchidae
paguri	Paguristes sp.	106844	Eucarida, Decapoda	Anomura	Paguroidae
zoeasp	crab zoea / juvenile (unspecified)	106673	Eucarida, Decapoda	Brachyura	Brachyura
auscra	Austrohelice crassa	444703	Eucarida, Decapoda	Brachyura	Grapsidae
hemcre	Hemigrapsus crenulatus	444772	Eucarida, Decapoda	Brachyura	Grapsidae
hemedw	Hemigrapsus sexdentatus	444780	Eucarida, Decapoda	Brachyura	Grapsidae
halvar	Halicarcinus varius	441790	Eucarida, Decapoda	Brachyura	Hymenosomatidae
halwhi	Halicarcinus whitei	441791	Eucarida, Decapoda	Brachyura	Hymenosomatidae
notomi	Notomithrax sp.	439471	Eucarida, Decapoda	Brachyura	Majidae
hemhir	Hemiplax hirtipes	1369189	Eucarida, Decapoda	Brachyura	Ocypodidae
pinnov	Nepinnotheres novaezelandiae	882147	Eucarida, Decapoda	Brachyura	Pinnotheridae
phiaus	Philocheras australis	515616	Eucarida, Decapoda	Caridea	Crangonidae
alpheu	Alpheus sp.	106978	Eucarida, Decapoda	Caridea	Alpheidae
palaem	Palaemon sp.	107032	Eucarida, Decapoda	Caridea	Palaemonidae
callia	Callianassa sp.	107072	Eucarida, Decapoda	Gebiidea	Callianassidae
ampeli	Ampelisca sp.	101445	Peracarida	Amphipoda	Ampilescidae
gammar	Gammaropsis sp.	101558	Peracarida	Amphipoda	Caprellida, Photidae
caprel	Caprellidae	101361	Peracarida	Amphipoda	Caprellidae
coroph	Corophium sp.	101489	Peracarida	Amphipoda	Corophidae
parexc	Paracorophium excavatum	414062	Peracarida	Amphipoda	Corophidae
dexami	Dexaminidae	101378	Peracarida	Amphipoda	Dexaminidae
methal	Methalimedon sp.	176968	Peracarida	Amphipoda	Exoedicerotidae
lysian	Lysianassidae	101395	Peracarida	Amphipoda	Lysianassidae
melawa	Melita awa	414064	Peracarida	Amphipoda	Melitidae
parnou	Paracalliope novizealandiae	547986	Peracarida	Amphipoda	Paracalliopiidae
phoxoc	Phoxocephalidae	101403	Peracarida	Amphipoda	Phoxocephalidae
torhur	Torridoharpinia hurleyi	237055	Peracarida	Amphipoda	Phoxocephalidae
waibre	Waitangi brevirostris	549241	Peracarida	Amphipoda	Phoxocephalidae
paramo	Paramoera chevreuxi	237165	Peracarida	Amphipoda	Pontogeneiidae
cyctho	Cyclaspis thomsoni	181760	Peracarida	Cumacea	Bodotriidae
collem	Colurostylis lemurum	181917	Peracarida	Cumacea	Diastylidae
cirola	Cirolanidae	118273	Peracarida	Isopoda	Cirolanidae
exowai	Exosphaeroma waitemata	257040	Peracarida	Isopoda	Sphaeromatidae
isocla	Isocladus sp.	205779	Peracarida	Isopoda	Sphaeromatidae
nebali	Nebalia	147031	Peracarida	Leptostraca	Nebaliidae
mysiad	Mysid shrimp	149668	Peracarida	Mysida	Mysidacea
ausmod	Austrominius modestus	712167	Maxillopoda, Cirripedia	Sessilia	Austrobalanidae
patiri	Patiriella regularis	377314	Asteroidea	Valvatida	Asterinidae
troden	Taeniogyrus dendyi	414278	Echinoidea	Holothuroidea	Apodida
ophiur	Ophiuroida sp.	123084	Ophiuroidea	Ophiuroida	Ophiuroida
solsil	Hiatula nitida	747148	Bivalvia	Myoida	Hiatellidae
mussen	Arcuatula senhousia	505946	Bivalvia	Mytiloida	Mytilidae
nuchar	Linucula hartvigiana	722857	Bivalvia	Nuculoida	Nuculidae
solpar	Solemya parkinsonii	507130	Bivalvia	Solemyoida	Solemyidae
artbif	Arthritica bifurca	592694	Bivalvia	Veneroida	Lasaeidae
laspar	Lasaea parangaensis	592716	Bivalvia	Veneroida	Lasaeidae
divari	Divaricella sp.	138145	Bivalvia	Veneroida	Lucinidae
papaus	Paphies australis	505806	Bivalvia	Veneroida	Mesodesmatidae
thelub	Theora lubrica	233903	Bivalvia	Veneroida	Semelidae?
maclil	Macomona liliana	599383	Bivalvia	Veneroida	Tellinidae
felzel	Zemysia zelandica	873248	Bivalvia	Veneroida	Ungulinidae
ausstu	Austrovenus stutchburyi	507386	Bivalvia	Veneroida	Veneridae
dilsub	Diloma subrostrata	546863	Gastropoda	Archaeogastropoda	Trochidae
micten	Micrelenchus tenebrosus	724125	Gastropoda	Archaeogastropoda	Trochidae
turaot	Turbonilla aoteana	565314	Gastropoda	Entomotaeniata	Pyramidellidae
signov	Sigapatella novaezelandiae	597421	Gastropoda	Mesogastropoda	Calyptraeidae
eatoni	Eatoniella sp.	196950	Gastropoda	Mesogastropoda	Eatoniellidae
zealut	Zeacumantus lutulentus	446442	Gastropoda	Mesogastropoda	Potamididae
comisp	Cominella sp.	196902	Gastropoda	Neogastropoda	Buccinidae
comads	Cominella adspersa	490921	Gastropoda	Neogastropoda	Buccinidae
comgla	Cominella glandiformis	598732	Gastropoda	Neogastropoda	Buccinidae
xymple	Xymene plebeius	399420	Gastropoda	Neogastropoda	Muricidae
amaaus	Amalda australis	409967	Gastropoda	Neogastropoda	Olividae
euttri	Euterebra tristis	438668	Gastropoda	Neogastropoda	Terebridae
neosin	Neoguraleus finlayi	434467	Gastropoda	Neogastropoda	Turridae
hamzel	Papawera zelandiae	1374462	Gastropoda	Opistobranchia	Haminoeidae
limpet	limpet sp.	7173	Gastropoda	Patellogastropoda	Lottiidae
notsca	Notoacmea scapha	511340	Gastropoda	Patellogastropoda	Lottiidae
chigla	Chiton glaucus	386775	Polyplacophora	Polyplacophora	Polyplacophora
chaeto	Chaetognath sp.	2081	Chaetognatha	Chaetognatha	Chaetognatha
edward	Edwardsia sp.	100665	Cnidaria	Anthozoa (anemone)	Edwardsiidae
antaur	Anthopleura hermaphroditica	283353	Cnidaria	Anthozoa (anemone)	Actinaria
nemert	Nemertean sp.	152391	Nemertea	Nemertea	Nemertea
phoron	Phoronis sp.	128545	Phoronida	Phoronida	Phoronida
flatwo	flat worm	793	Platyhelminthes	Polycladida	Turbellaria
cycova	Cyclomactra ovata	505656	Bivalvia	Veneroida	Mactridae
squarm	Pterygosquilla armata	246444	Malacostraca	Stomatopoda	Squillidae
limpul	Xenostrobus pulex	744582	Bivalvia	Mytiloida	Mytilidae
ischyr	Ischyroceridae	101389	Malacostraca_x000D_ _x000D_ Malacostraca	Amphipoda	Ischyroceridae
cragig	Magallana gigas	836033	Bivalvia	Ostreoida	Ostreadae
psethi	Pseudopolydora THIN	129621	Polychaeta	Spionida	Spionidae
potest	Potamopyrgus estuarine	598617	Gastropoda	Caenogastropoda	Hydrobiidae
protoh	Protohyale sp.	236513	Malacostraca	Eumalacostraca	Hyalidae
glygra	Goniada grahami	240455	Polychaeta	Phyllodocida	Goniadidae
lunsma	Lunella smaragdus	413416	Gastropoda	Vetigastropoda	Turbinidae
exochi	Exosphaeroma chilense	1264164	Peracarida	Isopoda	Sphaeromatidae
diopat	Diopatra sp.	129398	Polychaeta	Eunicida	Onuphidae
paramp	Paralepidonotus ampulliferus	209641	Polychaeta	Phyllodocida	Sigalionidae
zeasub	Zeacumantus subcarinatus	397205	Gastropoda	Mesogastropoda	Potamididae
nemato	Lysidice sp.	129280	Polychaeta	Eunicida	Eunicidae
exopla	Exosphaeroma planulum	257033	Peracarida	Isopoda	Sphaeromatidae
exoobt	Exosphaeroma obtusum	257030	Peracarida	Isopoda	Sphaeromatidae
bts	BTS	176946	Peracarida	Amphipoda	Pontogeneiidae
