# Supplementary material for: Multi-scale data on intertidal macrobenthic biodiversity and environmental features in three New Zealand harbours
Source: Copernicus journal article supplement (doi:10.5194/essd-12-293-2020), 2020-02-10
Supplement: Supplementary file 2 [file essd-12-293-2020-supplement.zip]

Archive with 2 entries (2 files):
- essd-12-293-2020-supplement-title-page.pdf
- Table_1_species_list.xlsx
